# Supplementary material for: Structural basis of Fusarium myosin I inhibition by phenamacril
Source: PubMed Central journal article supplement (PMC7100991; doi:10.1371/journal.ppat.1008323), 2020-03-12
Supplement: ppat.1008323.s008.pdf [file ppat.1008323.s008.pdf]

**S1 Table. Alignment of the FgMyoI (1-736) sequence with sequences of myosins with solved motor domain structures.**

*Dictyostelium discoideum* class 1 myosin: PDB 1LKX; *Rattus norvegicus* class 1 myosin: PDB 5V7X; *Argopecten irradians* class 2 myosin: PDB 1DFL; *Placopecten magellanicus* class 2 myosin: PDB 2EC6; *Doryteuthis pealeii* class 2 myosin: PDB 3I5G; *Bos Taurus* class 2 myosin: PDB 5N6A; *Dictyostelium discoideum* class 2 myosin: PDB 2Y8I; *Gallus gallus* class 5 myosin: PDB 1OE9; *Mus musculus* class 5 myosin: PDB 4ZLK; *Homo sapiens* class 10 myosin: PDB 5KG8; *Sus scrofa* class 6 myosin: PDB 4ANJ.

```

FgMyoI_1-736
1LKX_Myo1_D.discoideum ..... MGIS
5V7X_Myo1_R.norvegicus .....
1DFL_Myo2_A.irradians .....
2EC6_Myo2_P.magellanicus ..... MNIDFNDFQYLAVD RKKMMKEQTAPFDGKKN
3I5G_Myo2_D.pealeii ..... MTMDFSDPDMFLC LTRQKLM EATSIPFDGKKN
5N6A_Myo2_B.taurus ..... MVDAEMAAFGEA APYLRKSEKERLEA QTRPFDLKKD
2Y8I_Myo2_D.discoideum ..... NPIHDRTSDYHKYLKVKQGDSDLFKLTVSDKRYI
1OE9_Myo5_G.gallus ..... MAASELYTKYAR
4ZLK_Myo5_M.musculus MSYYHHHHHHYKDDDDKN IPTTENLYFQGAMGIRNSKAYVDEL TSPAMAASELYTKFAR
5KG8_Myo10_H.sapiens ..... NFFTETGR
4ANJ_Myo6_S.scrofa ..... MEDGKP
    
```

```

FgMyoI_1-736
1LKX_Myo1_D.discoideum RLPK NKGAGAAADGASGGAKPKKATFETTK ..... KEIGV S
5V7X_Myo1_R.norvegicus ..... MIPKT ..... KAEGV P
1DFL_Myo2_A.irradians ..... MAKKEVKSSLLD ..... NMIGV G
2EC6_Myo2_P.magellanicus CWVP DKEK.GFASAEIQSSKGEI TVKIVADSS TRTVKKDDIQS ..... MNPPK FFKLE
3I5G_Myo2_D.pealeii CWVP DPDF.GFVGA EIQSTKGDEV TVKTDKTQ ETRVVKKDDIGQ ..... RNPPK FEMNM
5N6A_Myo2_B.taurus VFPDD KE.EFVKATILSREGGK VTAETE HG.KTVTVKEDQVLQ ..... QNPPK FDKIE
2Y8I_Myo2_D.discoideum WYNP DPKERDSYECGEI VSETSDS FTFTVDGQDRQVKKDDANQ ..... RNPIK FGV E
1OE9_Myo5_G.gallus VWIP DPEEVWKS AELLKDYKPGDKV LQLRLEE GKDLEYCLDPK TKELP LRPNDILVGEN
4ZLK_Myo5_M.musculus VWIP DPEEVWKS AELLKDYKPGDKV LLLHLEE GKDLEYR LDPKTGELP HLRNPDILVGEN
5KG8_Myo10_H.sapiens VVLR ENGQ... HFPSTVNSCAE GIVVFR TDYGVQVFTYKQST ITHQKVTAMHPNTEE GVD
4ANJ_Myo6_S.scrofa VVAP HPTDGFQVGNIVDIGPDSL TIEPLNQKGTFFLALINQVFP ..... AEEDSKKDV E
    
```

```

FgMyoI_1-736
1LKX_Myo1_D.discoideum DLT LSKVSN EAIN E NLKRF EGE. RE IYTYI GHVLS VSNPFRD LG. IY TDDV LQSYMGKN
5V7X_Myo1_R.norvegicus DFVL LNQITENAF IE NLTMR HKKS. DN IYTYI GDVVI STNPK NKLN. IY KESD IKA YNGR Y
1DFL_Myo2_A.irradians DTVL LEPLNEE TFI DNLKRF DH. NE IYTYI GSVVI SVNPR SLP. IY SPEKVEDYRNRN
2EC6_Myo2_P.magellanicus DMAN MTYLNEASV LYNLRGRY TS. GL IYTYI SGLFC IAVNP YRRLP. IY TDSVI IAKYR GKR
3I5G_Myo2_D.pealeii DMAN MTYLNEASV LYNLRGRY TA. GL IYTYI SGLFC IAVNP YRRLP. IY TDSVI IAKYR GKR
5N6A_Myo2_B.taurus DMAM LTFLEH EAVLY NLKERY AS. WM IYTYI SGLFC VTI NP YKWL P. VY NAEV VAA YR GKR
2Y8I_Myo2_D.discoideum DMSEL SYLNEP AVFH NLKRVY NQ. DI IYTYI SGLFL VAVNP FKRIP. IY TQEMVD IFRGKR
1OE9_Myo5_G.gallus DLTAL SLYLHEP AVLH NLKRVRF IDSKL IYTYI CGIVL VAINP YEQLP. IY GEDI INAYSGQN
4ZLK_Myo5_M.musculus DLTAL SLYLHEP AVLH NLKRVRF IDSKL IYTYI CGIVL VAINP YEQLP. IY GEDI INAYSGQN
5KG8_Myo10_H.sapiens DMAS LTELHGGS IMY NLFQRY KR. NQ IYTYI GSI LSVNP YQF IAGLY EPATMEQY SRRH
4ANJ_Myo6_S.scrofa DNC SLMY LNEAT LLHN I KVR YSK. DR IYTYV ANIL IAVNP YFD LPK IY SSET IKS YOGKS
    
```

```

FgMyoI_1-736
1LKX_Myo1_D.discoideum RLEMP PHVFA IAEASY NMYKAYS DNQC V IISGESGAGKTEAAKR IMQY IASV SGGESGDI
5V7X_Myo1_R.norvegicus KYEMP PHMYA LANDAYR SMRQSQENOC V IISGESGAGKTEASKK IMQFLT FVSSNOSPNG
1DFL_Myo2_A.irradians FYEL S PHIFALS DEAYRS LRQDKDQC ILITGESGAGKTEASKL VM SVAAVCG. KGAEV
2EC6_Myo2_P.magellanicus KTEI PPHLFSVADNAY QNMTDRENO SCLITGESGAGKTENTK KVI MYLAKVACAVK...
3I5G_Myo2_D.pealeii RAEMP PHLFSIADNAY QYMLQDRENO SMLITGESGAGKTENTK KVI QYFALV AASLAGKK
5N6A_Myo2_B.taurus RSEAP PHIFSI DNAY QYMLTDRENO SILITGESGAGKT VNTK RVI QYFAV IAAIGD...
2Y8I_Myo2_D.discoideum RNEVAP PHIFAI SDVAYR SM LDDRONQ SLLITGESGAGKTENTK KVI QYLASV VAGRNQ...
1OE9_Myo5_G.gallus MGDMD PHIFAVAE EAYKQ MARDERNQ S IIVSGESGAGKT VSAKY AMRYFATV SSGSAS...
4ZLK_Myo5_M.musculus MGDMD PHIFAVAE EAYKQ MARDERNQ S IIVSGESGAGKT VSAKY AMRYFATV SSGSAS...
5KG8_Myo10_H.sapiens LGELP PHIFAI ANECKRCL WKRHRDNQC ILISGESGAGKTESTK LILKFLSV ISQSSL...
4ANJ_Myo6_S.scrofa LGTMP PHVFA IADKAF RDMK VRLKLSG S IIVSGESGAGKTENTK FLVRYL TE SYGTGQ...
    
```

```

FgMyoI_1-736
1LKX_Myo1_D.discoideum ..... KQIKDKM VLIATN P LLESFGNAKT LRNN NSSRFGKYLQ IY FNTQGEFV G
5V7X_Myo1_R.norvegicus ..... ERISKM LLDSPN LLEAFGNAKT LRND NSSRFGKYM EQFN AVGSPIG
1DFL_Myo2_A.irradians ..... NQVKEQL LQSTV LLEAFGNAKT VRND NSSRFGKYM D IEFDFKGD P LG
2EC6_Myo2_P.magellanicus KKD. EEASDKKEGS LEDQ I IQANP VLEAYGNAKT TRNN NSSRFGKFI RIRHF GPTGKTAG
3I5G_Myo2_D.pealeii DKKEEKKKDEKKG TLEDQ I VQCN P VLEAYGNAKT TRNN NSSRFGKFI RIRHF GTQKTAG
5N6A_Myo2_B.taurus ... RSKKEQATGKGT LEDQ I IQANP ALEAFGNAKT VRND NSSRFGKFI RIRHF GATGKLAS
2Y8I_Myo2_D.discoideum ..... ANGSV LEQQ I LQANP ILEAFGNAKT TRNN NSSRFGKFI RIRHF NSAGPISG
1OE9_Myo5_G.gallus ..... EANVEEKV LANS P IMESI GNAKT TRND NSSRFGKFI RIRHF DFKRYR IIG
4ZLK_Myo5_M.musculus ..... EANVEEKV LANS P IMESI GNAKT TRND NSSRFGKFI RIRHF DFKRYR IIG
5KG8_Myo10_H.sapiens ..... ELSLKEKT SVERA I LESSP I MEAFGNAKT VYNN NSSRFGKFI RIRHF CQKGNIQG
4ANJ_Myo6_S.scrofa ..... IDDR IVEANP LLEAFGNAKT VRNN NSSRFGKFI RIRHF NEKSVV G
    
```

↑  
R189

|                          |                                                            |     |     |     |     |
|--------------------------|------------------------------------------------------------|-----|-----|-----|-----|
|                          | 210                                                        | 220 | 230 | 240 | 250 |
| FgMyoI_1-736             | ADITNYLLEKSRVVGQITNERNFHFYQFAKGLASQQYRETFCVQK.....         |     |     |     |     |
| 1LKX_Myo1_D.discoideum   | GKITNYLLEKSRVVGRIQTGERSFHFYQMLKGLSQSKLDELGLTPN.....        |     |     |     |     |
| 5V7X_Myo1_R.norvegicus   | GVITSNYLLKSRVVKQPRGERNFHFYQQLSGASEELLHKLKLKERD.....        |     |     |     |     |
| 1DFL_Myo2_A.irradians    | ADITETYLLEKSRVTYQPSAERNYHFYQICSNATPELNDVMLVTP.....         |     |     |     |     |
| 2EC6_Myo2_P.magellanicus | ADITETYLLEKSRVTYQPSAERNYHFYQICSNATPELNEVMLITP.....         |     |     |     |     |
| 3I5G_Myo2_D.pealeii      | ADITETYLLEKSRVTYQPSAERNYHFYQQLLSPAFPENIEKLLAVP.....        |     |     |     |     |
| 5N6A_Myo2_B.taurus       | ADITETYLLEKSRVIFQLKARDYHFYQILSNKKPELLDMLLITN.....          |     |     |     |     |
| 2Y8I_Myo2_D.discoideum   | ASITQSYLLEKSRVVFQSETERNYHFYQQLLAGATAEKKALLHLAG.....        |     |     |     |     |
| 1OE9_Myo5_G.gallus       | ANMRTYLLEKSRVVFQAEERNYHFYQQLCASAALPEFKTLRLIGN.....         |     |     |     |     |
| 4ZLK_Myo5_M.musculus     | ANMRTYLLEKSRVVFQAEERNYHFYQQLCASAALPEFKTLRLIGN.....         |     |     |     |     |
| 5KG8_Myo10_H.sapiens     | GRIIVDYLLEKNRVVRQNPGERNYHFYQALLAGLEHEEREFFYLST.....        |     |     |     |     |
| 4ANJ_Myo6_S.scrofa       | GFVSHYLLEKSRICVQGRERNYHFYQRLCAGASEDIRERHLSSPDNFRYLNRGCTRYF |     |     |     |     |

L213-----S217

|                          |                                                                |     |     |     |     |
|--------------------------|----------------------------------------------------------------|-----|-----|-----|-----|
|                          | 260                                                            | 270 | 280 | 290 | 300 |
| FgMyoI_1-736             | .....PETYVTSRSKCLDVGIDDLAEFEDTLNAMKVIQLSQPEQDQIFRMLLS          |     |     |     |     |
| 1LKX_Myo1_D.discoideum   | .....APAYEYLKKS GCFPVSTIDDSGEFKIIVKAMETLGLKESDQNSIWRILLA       |     |     |     |     |
| 5V7X_Myo1_R.norvegicus   | .....FSRYNYLS.LDSAKVNGVDDAANFRTVNRAMQIVGFSDPEAESVLEVVVA        |     |     |     |     |
| 1DFL_Myo2_A.irradians    | .....DSGLYSFINQGCLTVDNIDDEVEFKLCEAFDILGFTKEEKQSMFKCTA          |     |     |     |     |
| 2EC6_Myo2_P.magellanicus | .....DSGLYSFINQGCLTVDNIDDEVEFKLCEAFDILGFTKEEKQSMFKCTA          |     |     |     |     |
| 3I5G_Myo2_D.pealeii      | .....DPGLYGFINGTLLTVDGDIDDEEEMGLTDAPDFVLGFTDEEKLKSMYKLTG       |     |     |     |     |
| 5N6A_Myo2_B.taurus       | .....NPYDYAFISQGETTVASIDDAEELMATDNAPDFVLGFTTEEKNSMYKLTG        |     |     |     |     |
| 2Y8I_Myo2_D.discoideum   | .....PESFNYLNQSGCVDIKGVSDEEFKITRQAMDIVGFSDPEQMSIFKRIIA         |     |     |     |     |
| 1OE9_Myo5_G.gallus       | .....ANYFHYTKQG GSPVIDGIDDAKEMVNTRQACTLLGISDSYQMGIFRILIA       |     |     |     |     |
| 4ZLK_Myo5_M.musculus     | .....ADSFHYTKQG GSPVIDGIDDAKEMVNTRQACTLLGISDSYQMGIFRILIA       |     |     |     |     |
| 5KG8_Myo10_H.sapiens     | .....PENYHYLNQSGCVDKTIISDQESFREVITAMDVMQFSKEEVREVSRIILA        |     |     |     |     |
| 4ANJ_Myo6_S.scrofa       | ANKETDKQIILQNRKSPYLLKASGLKDFLLDDHGDFFIRMCAMKKGIGLDDEEKLDLFRVVA |     |     |     |     |

|                          |                                                                  |     |     |     |     |
|--------------------------|------------------------------------------------------------------|-----|-----|-----|-----|
|                          | 310                                                              | 320 | 330 | 340 | 350 |
| FgMyoI_1-736             | AILWIGNIQFQEDQGG.....YAEVTRDSVDFAAAYLMEVTPDQLIKGTTIRILTP...      |     |     |     |     |
| 1LKX_Myo1_D.discoideum   | AILHIGNITFAEAAAEQRTGTTTVKVSDTKSLAAAASCLKTDQQSLIALCYRSISTGVG.     |     |     |     |     |
| 5V7X_Myo1_R.norvegicus   | AVLKLGNIEFKPESRMN.GLDES KIKDKNE LKEICE LTIIDQVVLERAFSFRIVAEK...  |     |     |     |     |
| 1DFL_Myo2_A.irradians    | SILHMGEMKFK...QRPREEQAESDGTAEAEKVAF LCGINAGDLLKALLKPKVKVG...     |     |     |     |     |
| 2EC6_Myo2_P.magellanicus | SILHMGEMKFK...QRPREEQAESDGTAEAEKVAF LCGINAGDLLKALLKPKVKVG...     |     |     |     |     |
| 3I5G_Myo2_D.pealeii      | CILHLGEMKWK...QRG...EQAEADGTAEAEKVAF LLLVNGDLLKALLKPKVKVG...     |     |     |     |     |
| 5N6A_Myo2_B.taurus       | AIMHFGNMKFK...LQREEQAEADGTAEAEKVAF LMG LNSADLLKGLCHPRVKVG...     |     |     |     |     |
| 2Y8I_Myo2_D.discoideum   | GILHLGNIEKFE...KGADEGAVLKDKTALNAASTVFG.VNPSVLEKALLMEPRILAG...    |     |     |     |     |
| 1OE9_Myo5_G.gallus       | GILHLGNVEFA...SRDSDSCAIPPKHDP LTIIFCDLMGV DYEEMAHWLCRRKLATA...   |     |     |     |     |
| 4ZLK_Myo5_M.musculus     | GILHLGNVEFA...SRDSDSCAIPPKHDP LTIIFCDLMGV DYEEMAHWLCRRKLATA...   |     |     |     |     |
| 5KG8_Myo10_H.sapiens     | GILHLGNIEFTI...TAGSQTVPKHEP LTIIFCDLMGV DYEEMAHWLCRRKLATA...     |     |     |     |     |
| 4ANJ_Myo6_S.scrofa       | GVLHLGNIDPEEAG.STSGGCNLLKNKSTQALLEYCAE LLLGLDQDDLRVSLTTRVMLTTAGG |     |     |     |     |

|                          |                                                                   |     |     |     |     |     |
|--------------------------|-------------------------------------------------------------------|-----|-----|-----|-----|-----|
|                          | 360                                                               | 370 | 380 | 390 | 400 | 410 |
| FgMyoI_1-736             | RNGEVIESPANPAQAQATRDALAMATYSNLFDWIVE RINKSLKARQPT.TNTIGILDIYG     |     |     |     |     |     |
| 1LKX_Myo1_D.discoideum   | KKCSVISVPMDCNQAAYSRDALAKALYERLFWNLVSKINTIINCTTEK.GPVIIGILDIYG     |     |     |     |     |     |
| 5V7X_Myo1_R.norvegicus   | ..QEKVSTLNLVAQAAYARDALAKNLYSRLFSWLVNRINESITKAQTKVRKVMGVLDIYG      |     |     |     |     |     |
| 1DFL_Myo2_A.irradians    | ..TEMVTKGQNMNVNSVVGALAKSLYDRMFNLVLRVNRKTLDTKAKRNYIIG.VLDIYG       |     |     |     |     |     |
| 2EC6_Myo2_P.magellanicus | ..TEMVTKGQNLQVINSVVGALAKSLYDRMFNLVLRVNRKTLDTKAKRNYIIG.VLDIYG      |     |     |     |     |     |
| 3I5G_Myo2_D.pealeii      | ..TEYVTQGRNKDQVNTSIAALAKSLYDRMFNLVLRVNRKTLDTKAKRQFFIIG.VLDIYG     |     |     |     |     |     |
| 5N6A_Myo2_B.taurus       | ..NEYVTGQNVQVYVYAKALAKAVYERMFNMMVTRINATLETQKQPROYFIIG.VLDIYG      |     |     |     |     |     |
| 2Y8I_Myo2_D.discoideum   | ..RDLVQAHLNVEKSSSRDALVAKALYGRFLWLVKKINNVLCQE.RKAYFIIG.VLDIYG      |     |     |     |     |     |
| 1OE9_Myo5_G.gallus       | ..TETYIKPISKLHAINARDALAKHLYANLFWIWDHVNKALHSTVKQHSFIIG.VLDIYG      |     |     |     |     |     |
| 4ZLK_Myo5_M.musculus     | ..TETYIKPISKLQATNARDALAKHLYAKLFWIWDHVNQALHSAVKQHSFIIG.VLDIYG      |     |     |     |     |     |
| 5KG8_Myo10_H.sapiens     | ..GEEILTLPLNVQAVDSRDSLAMALYACCFEYVVIKINSRIRKGN.EDPKSIIG.VLDIYG    |     |     |     |     |     |
| 4ANJ_Myo6_S.scrofa       | AKGTVLKVP LKVEQANNARDALAKTVYSHLFDHVVNRVNRVQCPEPFETSS..YFIIGVLDIYG |     |     |     |     |     |

M375

Y409

|                          |                                                                |     |     |     |     |
|--------------------------|----------------------------------------------------------------|-----|-----|-----|-----|
|                          | 420                                                            | 430 | 440 | 450 | 460 |
| FgMyoI_1-736             | FEIFEKNSFEQLCINYNVEKLOQIFITQLTLKAEQEEYAREQITQWTPIKY.FDNKVVCDLI |     |     |     |     |
| 1LKX_Myo1_D.discoideum   | FEVVFQNNSEQLNINFCNEKLOQLFIELTLKSEQEEYVREGEIWKNIEX.FNNKPIIBLI   |     |     |     |     |
| 5V7X_Myo1_R.norvegicus   | FEIFEDNSFEQFIINYNCKLQQLFIELTLKSEQEEYIREDIEWETHIDY.FNNAIICDLI   |     |     |     |     |
| 1DFL_Myo2_A.irradians    | FEIFDFNSFEQLCINYNTERLQQFNFNHMFVLEQEEYKKEGIAWEFIDFGMDLQMCIDL    |     |     |     |     |
| 2EC6_Myo2_P.magellanicus | FEIFDFNSFEQLCINYNTERLQQFNFNHMFVLEQEEYKKEGIAWEFIDFGMDLQMCIDL    |     |     |     |     |
| 3I5G_Myo2_D.pealeii      | FEIFDFNSFEQLCINYNTERLQQFNFNHMFVLEQEEYKKEGIAWEFIDFGMDLQACIDL    |     |     |     |     |
| 5N6A_Myo2_B.taurus       | FEIFDFNSFEQLCINYNTERLQQFNFNHMFVLEQEEYKKEGIAWEFIDFGMDLQACIDL    |     |     |     |     |
| 2Y8I_Myo2_D.discoideum   | FEIFKVNSEQLCINYNTEKLOQFNFNHMFVLEQEEYKKEGIAWEFIDFGMDLQACIDL     |     |     |     |     |
| 1OE9_Myo5_G.gallus       | FETFEINSFEQFCINYNANEKLOQFNFNHMFVLEQEEYKKEGIAWEFIDFGMDLQACIDL   |     |     |     |     |
| 4ZLK_Myo5_M.musculus     | FETFEINSFEQFCINYNANEKLOQFNFNHMFVLEQEEYKKEGIAWEFIDFGMDLQACIDL   |     |     |     |     |
| 5KG8_Myo10_H.sapiens     | FENFEVNHFEQFCINYNANEKLOEYFNKHFISLEQLEYSRREGLVWEDIDWIDNGE.CLDLI |     |     |     |     |
| 4ANJ_Myo6_S.scrofa       | FEEFEHNSFEQFCINYNCKLQQLFENRILKEQELYQKEGLGVNEVHY.VDNQDCIDL      |     |     |     |     |

F419 E420 C423 I424

|                          |     |     |     |     |     |   |   |   |   |   |   |   |   |   |   |   |   |   |   |   |   |   |   |   |   |   |   |   |   |   |   |   |   |   |   |   |   |   |   |   |   |   |       |       |       |   |   |   |       |       |   |   |   |   |   |   |   |   |   |
|--------------------------|-----|-----|-----|-----|-----|---|---|---|---|---|---|---|---|---|---|---|---|---|---|---|---|---|---|---|---|---|---|---|---|---|---|---|---|---|---|---|---|---|---|---|---|---|-------|-------|-------|---|---|---|-------|-------|---|---|---|---|---|---|---|---|---|
|                          | 470 | 480 | 490 | 500 | 510 |   |   |   |   |   |   |   |   |   |   |   |   |   |   |   |   |   |   |   |   |   |   |   |   |   |   |   |   |   |   |   |   |   |   |   |   |   |       |       |       |   |   |   |       |       |   |   |   |   |   |   |   |   |   |
| FgMyoI_1-736             | E   | Q   | I   | R   | P   | V | G | I | F | S | A | M | K | D | A | K | T | F | A | H | A | D | P | A | A | C | D | R | T | F | M | Q | S | I | N | G | M | S | H | A | H | L | T     | F     | R     | Q | G | N | ..... |       |   |   |   |   |   |   |   |   |   |
| 1LKX_Myo1_D.discoideum   | E   | K   | K   | .   | P   | I | G | L | I | S | L | L | D | E | A | C | L | I | A | K | S | T | D | Q | T | F | L | D | S | I | C | K | F | E | K | N | P | H | L | Q | S | Y | V     | S     | K     | D | R | S | I     | ..... |   |   |   |   |   |   |   |   |   |
| 5V7X_Myo1_R.norvegicus   | E   | N   | N   | T   | N   | G | I | L | A | M | L | D | E | E | C | L | R | P | G | T | V | D | E | T | F | L | E | K | L | N | Q | V | C | A | T | H | Q | H | F | E | S | R | M     | S     | K     | C | S | R | F     | L     | N | D | T | T | L | P | H | S | C |
| 1DFL_Myo2_A.irradians    | E   | K   | .   | .   | P   | M | G | I | L | S | I | L | E | E | C | M | F | P | K | A | D | D | K | S | F | Q | D | K | L | Y | Q | N | H | M | G | K | N | R | M | F | T | K | P     | G     | K     | P | T | R | ..... |       |   |   |   |   |   |   |   |   |   |
| 2EC6_Myo2_P.magellanicus | E   | K   | .   | .   | P   | M | G | I | L | S | I | L | E | E | C | M | F | P | K | A | D | D | K | S | F | Q | D | Y | S | Y | Q | N | H | I | G | K | N | R | M | F | T | K | P     | G     | K     | P | T | R | ..... |       |   |   |   |   |   |   |   |   |   |
| 3I5G_Myo2_D.pealeii      | E   | K   | .   | .   | P   | M | G | I | L | S | I | L | E | E | C | M | F | P | K | A | D | D | K | S | F | Q | D | Y | S | Y | Q | N | H | I | G | K | N | R | M | F | T | K | P     | G     | K     | P | T | R | ..... |       |   |   |   |   |   |   |   |   |   |
| 5N6A_Myo2_B.taurus       | E   | K   | .   | .   | P   | M | G | I | M | S | I | L | E | E | C | M | F | P | K | A | T | D | M | T | F | K | A | K | L | F | D | N | H | L | G | K | S | N | F | Q | K | P | ..... |       |       |   |   |   |       |       |   |   |   |   |   |   |   |   |   |
| 2Y8I_Myo2_D.discoideum   | D   | G   | R   | Q   | P   | P | G | I | L | A | L | L | D | E | Q | S | V | F | P | N | A | T | D | N | T | L | I | T | K | L | H | S | H | F | S | K | K | N | A | K | Y | E | E     | P     | ..... |   |   |   |       |       |   |   |   |   |   |   |   |   |   |
| 1OE9_Myo5_G.gallus       | E   | A   | .   | .   | K   | M | G | V | L | D | L | L | D | E | E | C | K | M | F | K | G | S | D | T | W | A | Q | K | L | Y | N | T | H | L | N | K | C | A | L | F | E | K | P     | ..... |       |   |   |   |       |       |   |   |   |   |   |   |   |   |   |
| 4ZLK_Myo5_M.musculus     | E   | S   | .   | .   | K   | L | G | L | L | D | L | L | D | E | E | C | K | M | F | K | G | T | D | T | W | A | Q | K | L | Y | N | T | H | L | N | K | C | A | L | F | E | K | P     | ..... |       |   |   |   |       |       |   |   |   |   |   |   |   |   |   |
| 5KG8_Myo10_H.sapiens     | E   | K   | .   | .   | K   | L | G | L | L | A | L | I | N | E | S | H | E | F | P | Q | A | T | D | S | T | L | L | E | K | L | H | S | O | H | A | N | . | N | H | F | Y | V | K     | P     | ..... |   |   |   |       |       |   |   |   |   |   |   |   |   |   |
| 4ANJ_Myo6_S.scrofa       | E   | A   | R   | .   | L   | V | G | I | L | D | L | L | D | E | N | R | L | E | Q | P | S | D | Q | H | E | T | S | A | V | H | Q | K | H | K | D | H | F | R | L | S | I | P | R     | K     | S     | K | L | A | I     | H     | R | N | . |   |   |   |   |   |   |

|                          |     |     |     |     |     |   |   |   |   |   |   |   |   |   |   |   |   |   |   |   |   |   |   |   |   |   |   |   |   |   |   |   |   |   |   |   |   |   |   |   |   |   |   |   |   |   |   |   |       |       |   |   |   |   |   |   |   |   |   |   |   |
|--------------------------|-----|-----|-----|-----|-----|---|---|---|---|---|---|---|---|---|---|---|---|---|---|---|---|---|---|---|---|---|---|---|---|---|---|---|---|---|---|---|---|---|---|---|---|---|---|---|---|---|---|---|-------|-------|---|---|---|---|---|---|---|---|---|---|---|
|                          | 520 | 530 | 540 | 550 | 560 |   |   |   |   |   |   |   |   |   |   |   |   |   |   |   |   |   |   |   |   |   |   |   |   |   |   |   |   |   |   |   |   |   |   |   |   |   |   |   |   |   |   |   |       |       |   |   |   |   |   |   |   |   |   |   |   |
| FgMyoI_1-736             | F   | I   | K   | H   | Y   | A | G | D | V | T | Y | T | V | E | G | I | T | D | K | N | K | D | Q | L | K | G | L | L | A | L | F | Q | H | S | G | . | N | D | F | V | H | T | L | F | P | R | P | V | ..... |       |   |   |   |   |   |   |   |   |   |   |   |
| 1LKX_Myo1_D.discoideum   | F   | R   | L   | K   | H   | Y | A | G | D | V | T | Y | D | V | R | G | L | D | K | N | K | D | T | L | F | G | D | L | I | S | S | M | Q | S | S | . | D | P | L | V | Q | G | L | F | P | P | T | R | ..... |       |   |   |   |   |   |   |   |   |   |   |   |
| 5V7X_Myo1_R.norvegicus   | F   | R   | I   | Q   | H   | Y | A | G | K | V | I | Y | Q | V | E | G | F | V | D | K | N | N | D | L | Y | R | D | L | S | Q | A | M | W | K | A | G | . | H | A | L | L | K | S | L | F | P | E | G | N     | ..... |   |   |   |   |   |   |   |   |   |   |   |
| 1DFL_Myo2_A.irradians    | F   | L   | F   | L   | H   | Y | A | G | N | V | P | Y | S | I | T | G | W | L | E | K | N | K | D | P | I | N | E | N | V | V | A | L | L | G | A | S | K | . | E | P | L | V | A | E | L | F | K | A | P     | E     | . |   |   |   |   |   |   |   |   |   |   |
| 2EC6_Myo2_P.magellanicus | F   | L   | F   | L   | H   | Y | A | G | N | V | P | Y | S | I | A | G | W | L | E | K | N | K | D | P | I | N | E | N | V | V | L | L | A | V | S | K | . | E | P | L | V | A | E | L | F | R | A | P | D     | .     |   |   |   |   |   |   |   |   |   |   |   |
| 3I5G_Myo2_D.pealeii      | F   | L   | F   | L   | H   | Y | A | G | N | V | P | Y | S | I | A | G | W | L | E | K | N | K | D | P | I | N | E | N | V | V | L | L | Q | N | S | K | . | E | P | L | V | K | M | L | F | T | P | P | R     | .     |   |   |   |   |   |   |   |   |   |   |   |
| 5N6A_Myo2_B.taurus       | F   | S   | L   | I   | H   | Y | A | G | T | V | Y | N | I | I | G | W | L | Q | K | N | K | D | P | L | N | E | T | V | D | L | Y | K | S | S | . | L | K | M | L | S | L | F | A | N | Y | A | G | F | D     | T     | P | I | E | K | G | K |   |   |   |   |   |
| 2Y8I_Myo2_D.discoideum   | F   | G   | V   | T   | H   | Y | A | G | O | V | M | Y | E | I | Q | D | W | L | E | K | N | K | D | P | L | Q | Q | D | L | E | L | C | F | K | D | S | . | D | N | V | T | K | L | F | N | D | P | N | ..... |       |   |   |   |   |   |   |   |   |   |   |   |
| 1OE9_Myo5_G.gallus       | F   | I   | I   | K   | H   | F | A | D | K | V | E | Y | Q | C | E | G | F | L | E | K | N | K | D | T | V | F | E | E | Q | I | K | V | L | K | S | S | . | K | K | F | K | L | L | P | E | L | F | Q | D     | E     | E | K | A | I | S | P | T | S | A | T | P |
| 4ZLK_Myo5_M.musculus     | F   | I   | I   | K   | H   | F | A | D | K | V | E | Y | Q | C | E | G | F | L | E | K | N | K | D | T | V | F | E | E | Q | I | K | V | L | K | S | S | . | F | K | M | L | P | E | L | F | Q | D | E | K     | A     | I | S | P | T | S | A | T | P |   |   |   |
| 5KG8_Myo10_H.sapiens     | F   | G   | V   | K   | H   | Y | A | G | E | V | Y | D | V | R | G | L | E | K | N | R | D | T | F | R | D | L | L | N | L | L | R | E | S | R | . | F | D | F | I | Y | D | L | F | E | H | V | S | R | N     | N     | Q | D | A | A | A | A | A | A |   |   |   |
| 4ANJ_Myo6_S.scrofa       | F   | I   | I   | R   | H   | F | A | G | A | V | C | Y | E | T | T | Q | F | V | E | K | N | N | D | A | L | H | M | S | L | E | S | L | I | C | E | S | R | . | D | K | F | I | R | E | L | F | E | S | S     | T     | N | N | K | D | T | K | Q | K | A |   |   |

D536---N538 D540

|                          |     |     |     |     |   |   |   |       |       |   |   |   |   |   |   |   |   |   |   |   |   |   |   |   |   |   |   |   |   |   |   |   |   |   |   |   |   |   |   |   |   |   |   |   |   |   |   |   |   |   |   |   |   |   |   |   |   |   |
|--------------------------|-----|-----|-----|-----|---|---|---|-------|-------|---|---|---|---|---|---|---|---|---|---|---|---|---|---|---|---|---|---|---|---|---|---|---|---|---|---|---|---|---|---|---|---|---|---|---|---|---|---|---|---|---|---|---|---|---|---|---|---|---|
|                          | 570 | 580 | 590 | 600 |   |   |   |       |       |   |   |   |   |   |   |   |   |   |   |   |   |   |   |   |   |   |   |   |   |   |   |   |   |   |   |   |   |   |   |   |   |   |   |   |   |   |   |   |   |   |   |   |   |   |   |   |   |   |
| FgMyoI_1-736             | N   | .   | R   | K   | Q | P | P | ..... | S     | A | G | D | R | I | R | A | S | A | N | A | L | V | D | T | L | M | K | C | Q | P | S | Y | I | R | T | I | K | F | N | E | N |   |   |   |   |   |   |   |   |   |   |   |   |   |   |   |   |   |
| 1LKX_Myo1_D.discoideum   | S   | .   | K   | K   | R | P | E | ..... | T     | A | G | S | Q | F | R | N | A | M | N | A | L | T | T | L | L | A | C | S | P | H | Y | V | R | C | I | K | S | N | D | N |   |   |   |   |   |   |   |   |   |   |   |   |   |   |   |   |   |   |
| 5V7X_Myo1_R.norvegicus   | V   | N   | L   | K   | R | P | P | ..... | T     | A | G | S | Q | F | K | A | S | V | A | T | L | M | K | N | L | Q | T | K | N | P | N | Y | I | R | C | I | K | B | N | D | K |   |   |   |   |   |   |   |   |   |   |   |   |   |   |   |   |   |
| 1DFL_Myo2_A.irradians    | K   | K   | K   | G   | K | S | S | ..... | A     | F | Q | T | I | S | A | V | H | R | E | S | L | N | K | L | M | K | N | L | Y | S | T | H | P | F | V | R | C | I | I | P | N | E | L |   |   |   |   |   |   |   |   |   |   |   |   |   |   |   |
| 2EC6_Myo2_P.magellanicus | K   | K   | K   | K   | K | S | S | ..... | A     | F | Q | T | I | S | A | V | H | R | E | S | L | N | K | L | M | K | N | L | Y | S | T | H | P | F | V | R | C | I | I | P | N | E | L |   |   |   |   |   |   |   |   |   |   |   |   |   |   |   |
| 3I5G_Myo2_D.pealeii      | K   | K   | K   | G   | K | S | A | ..... | A     | F | Q | T | I | S | S | V | H | R | E | S | L | N | K | L | M | K | N | L | Y | S | T | H | P | F | V | R | C | I | I | P | N | E | L |   |   |   |   |   |   |   |   |   |   |   |   |   |   |   |
| 5N6A_Myo2_B.taurus       | G   | K   | A   | K   | K | G | S | ..... | S     | F | Q | T | V | S | A | L | H | R | E | N | L | N | K | L | M | T | N | L | R | S | T | H | P | F | V | R | C | I | I | P | N | E | T |   |   |   |   |   |   |   |   |   |   |   |   |   |   |   |
| 2Y8I_Myo2_D.discoideum   | S   | R   | A   | K   | K | G | A | ..... | N     | F | I | T | V | A | A | Q | Y | K | E | Q | L | A | S | L | M | A | T | L | E | T | T | N | P | H | F | V | R | C | I | I | P | N | N | K |   |   |   |   |   |   |   |   |   |   |   |   |   |   |
| 1OE9_Myo5_G.gallus       | S   | G   | R   | V   | P | L | S | R     | T     | P | V | K | P | A | K | A | R | P | Q | T | S | K | E | H | K | K | T | V | G | H | Q | F | R | N | S | L | H | L | M | E | T | L | N | A | T | T | P | H | F | V | R | C | I | K | B | N | D | F |
| 4ZLK_Myo5_M.musculus     | S   | G   | R   | T   | P | L | T | R     | V     | P | V | K | P | T | K | G | R | P | Q | T | A | K | E | H | K | K | T | V | G | H | Q | F | R | N | S | L | H | L | M | E | T | L | N | A | T | T | P | H | F | V | R | C | I | K | B | N | D | F |
| 5KG8_Myo10_H.sapiens     | A   | A   | A   | A   | A | R | R | P     | ..... | T | V | S | S | Q | F | K | D | S | L | H | S | L | M | A | T | L | S | S | N | P | F | F | V | R | C | I | K | B | N | M | Q |   |   |   |   |   |   |   |   |   |   |   |   |   |   |   |   |   |
| 4ANJ_Myo6_S.scrofa       | G   | K   | L   | S   | F | I | S | ..... | V     | G | N | K | F | K | T | Q | L | N | L | L | D | K | L | R | S | T | G | A | S | E | I | R | C | I | K | B | N | L | K |   |   |   |   |   |   |   |   |   |   |   |   |   |   |   |   |   |   |   |

A577

|                          |     |     |     |     |     |     |   |   |   |   |   |   |   |   |   |   |   |   |   |   |   |   |   |   |   |   |   |   |   |   |   |   |   |   |   |   |   |   |   |   |   |   |   |   |   |   |   |   |   |   |   |       |   |       |       |       |
|--------------------------|-----|-----|-----|-----|-----|-----|---|---|---|---|---|---|---|---|---|---|---|---|---|---|---|---|---|---|---|---|---|---|---|---|---|---|---|---|---|---|---|---|---|---|---|---|---|---|---|---|---|---|---|---|---|-------|---|-------|-------|-------|
|                          | 610 | 620 | 630 | 640 | 650 | 660 |   |   |   |   |   |   |   |   |   |   |   |   |   |   |   |   |   |   |   |   |   |   |   |   |   |   |   |   |   |   |   |   |   |   |   |   |   |   |   |   |   |   |   |   |   |       |   |       |       |       |
| FgMyoI_1-736             | K   | S   | P   | T   | E   | Y   | N | G | P | N | V | L | H | O | I | K | Y | L | G | L | Q | E | N | V | R | I | R | A | G | F | A | Y | R | Q | D | F | K | F | V | D | R | F | L | S | P | A | T | S | Y | A | G | E     | F | T     | W     | E     |
| 1LKX_Myo1_D.discoideum   | K   | Q   | A   | G   | V   | I   | D | E | D | R | V | R | H | O | V | R | L | G | L | L | E | N | V | R | V | R | A | G | F | A | G | R | I | E | Y | T | R | F | Y | N | R | Y | K | M | L | C | K | T | W | P | S | ..... |   |       |       |       |
| 5V7X_Myo1_R.norvegicus   | K   | A   | A   | H   | I   | F   | S | E | S | L | V | C | H | O | I | R | Y | L | G | L | L | E | N | V | R | V | R | A | G | F | A | R | Q | A | Y | E | P | C | L | E | R | Y | K | M | L | C | K | Q | T | W | P | ..... |   |       |       |       |
| 1DFL_Myo2_A.irradians    | K   | Q   | F   | G   | L   | V   | D | A | E | L | V | L | H | Q | L | Q | C | N | G | V | L | E | G | I | R | I | C | R | K | G | F | P | S | R | L | I | Y | S | E | F | K | Q | R | Y | S | I | L | A | P | N | A | I     | P | Q     | ..... |       |
| 2EC6_Myo2_P.magellanicus | K   | Q   | F   | G   | L   | V   | D | A | E | L | V | L | H | Q | L | Q | C | N | G | V | L | E | G | I | R | I | C | R | K | G | F | P | S | R | L | I | Y | S | E | F | K | Q | R | Y | S | I | L | A | P | N | A | I     | P | Q     | ..... |       |
| 3I5G_Myo2_D.pealeii      | K   | T   | P   | G   | L   | I   | D | A | A | L | V | L | H | Q | L | R | C | N | G | V | L | E | G | I | R | I | C | R | K | G | F | P | N | R | I | Y | S | E | F | K | Q | R | Y | S | I | L | A | P | N | A | V | P     | S | ..... |       |       |
| 5N6A_Myo2_B.taurus       | K   | S   | P   | G   | V   | I   | D | N | P | L | V | M | H | O | L | R | C | N | G | V | L | E | G | I | R | I | C | R | K | G | F | P | N | R | I | L | Y | G | D | F | R | Q | R | Y | S | I | L | N | P | A | A | I     | P | E     | Q     | ..... |
| 2Y8I_Myo2_D.discoideum   | Q   |     |     |     |     |     |   |   |   |   |   |   |   |   |   |   |   |   |   |   |   |   |   |   |   |   |   |   |   |   |   |   |   |   |   |   |   |   |   |   |   |   |   |   |   |   |   |   |   |   |   |       |   |       |       |       |

FgMyoI\_1-736  
 1LKX\_Myo1\_D.discoideum YLAYRAES.....  
 5V7X\_Myo1\_R.norvegicus WKCRTHFLLMKGLNDIFEAQKAI EWHEDYKDDDDK.....  
 1DFL\_Myo2\_A.irradians YLIRKAYKKLQDQRIGLSVIQRNIRKWLVLRRNQWKKLYSKVKP.....  
 2EC6\_Myo2\_P.magellanicus YLIRKAYKKLQDQRIGLSVIQRNIRKWLVLRRNQWKKLYAKVKP.....  
 3I5G\_Myo2\_D.pealeii YLMRKAYKKLQDQRIGLTLIQRNVKWLVLRRNWEWRLFNKVKPLL.....  
 5N6A\_Myo2\_B.taurus VLSRMEFKKLLERRDSSLTIQWNIRAFMGVKNWP.....  
 2Y8I\_Myo2\_D.discoideum .....  
 1OE9\_Myo5\_G.gallus WLMRKKYMRMRGDA.....  
 4ZLK\_Myo5\_M.musculus WLLRKKRYLCMQR.....  
 5KG8\_Myo10\_H.sapiens .....  
 4ANJ\_Myo6\_S.scrofa ICSRWKKVQWC SLSVIKLNKNIKYRAEAVSKGEEFLTGVVPILEVELDGDVNGHKFSVSGE

FgMyoI\_1-736  
 1LKX\_Myo1\_D.discoideum .....  
 5V7X\_Myo1\_R.norvegicus .....  
 1DFL\_Myo2\_A.irradians .....  
 2EC6\_Myo2\_P.magellanicus .....  
 3I5G\_Myo2\_D.pealeii .....  
 5N6A\_Myo2\_B.taurus .....  
 2Y8I\_Myo2\_D.discoideum .....  
 1OE9\_Myo5\_G.gallus .....  
 4ZLK\_Myo5\_M.musculus .....  
 5KG8\_Myo10\_H.sapiens .....  
 4ANJ\_Myo6\_S.scrofa GEGDATYGKLT LKFICTTGKLPVWP TLVTTFGYGVQCFARYPDHMRQHDFFKSAMPEGY

FgMyoI\_1-736  
 1LKX\_Myo1\_D.discoideum .....  
 5V7X\_Myo1\_R.norvegicus .....  
 1DFL\_Myo2\_A.irradians .....  
 2EC6\_Myo2\_P.magellanicus .....  
 3I5G\_Myo2\_D.pealeii .....  
 5N6A\_Myo2\_B.taurus .....  
 2Y8I\_Myo2\_D.discoideum .....  
 1OE9\_Myo5\_G.gallus .....  
 4ZLK\_Myo5\_M.musculus .....  
 5KG8\_Myo10\_H.sapiens .....  
 4ANJ\_Myo6\_S.scrofa VQERTIFFKDDGN YKTRAEVKKFEGDTLVNRIELKGIDFKEDGNILGHKLEYNYNSHNVI

FgMyoI\_1-736  
 1LKX\_Myo1\_D.discoideum .....  
 5V7X\_Myo1\_R.norvegicus .....  
 1DFL\_Myo2\_A.irradians .....  
 2EC6\_Myo2\_P.magellanicus .....  
 3I5G\_Myo2\_D.pealeii .....  
 5N6A\_Myo2\_B.taurus .....  
 2Y8I\_Myo2\_D.discoideum .....  
 1OE9\_Myo5\_G.gallus .....  
 4ZLK\_Myo5\_M.musculus .....  
 5KG8\_Myo10\_H.sapiens .....  
 4ANJ\_Myo6\_S.scrofa MADKQKNGIKVNFKIRHNI EDGSVQLADHYQQNTPIGDGPVLLPDNHLYLSYQSALS KDPN

FgMyoI\_1-736  
 1LKX\_Myo1\_D.discoideum .....  
 5V7X\_Myo1\_R.norvegicus .....  
 1DFL\_Myo2\_A.irradians .....  
 2EC6\_Myo2\_P.magellanicus .....  
 3I5G\_Myo2\_D.pealeii .....  
 5N6A\_Myo2\_B.taurus .....  
 2Y8I\_Myo2\_D.discoideum .....  
 1OE9\_Myo5\_G.gallus .....  
 4ZLK\_Myo5\_M.musculus .....  
 5KG8\_Myo10\_H.sapiens .....  
 4ANJ\_Myo6\_S.scrofa EKRDHMLLEFVTAAGITHGMDELYK
