# Supplementary material for: Structural basis of Fusarium myosin I inhibition by phenamacril
Source: PubMed Central journal article supplement (PMC7100991; doi:10.1371/journal.ppat.1008323), 2020-03-12
Supplement: ppat.1008323.s009.pdf [file ppat.1008323.s009.pdf]

**S2 Table. Sequence alignment of the myosin I motor domains of phenamacril-sensitive (red box) and phenamacril-resistant species.**

Pocket residues are labeled with variable pocket residues highlighted in green. F. : *Fusarium*; M. : *Magnaporthe*; B. : *Botrytis*; A. : *Aspergillus*; S.: *Saccharomyces*; H. : *Homo*; D.: *Dictyostelium*; \*: Amino acid whose mutation cause high or medium resistance to phenamacril.

|                           | 1       | 10            | 20                | 30           | 40             |
|---------------------------|---------|---------------|-------------------|--------------|----------------|
| F. <i>graminearum</i>     | MGISRRP | KNKGAG        | AAADGASGGAKP      | KKATFETTKKKE | IGVSDLTLLSKV   |
| F. <i>fujikuroi</i>       | MGISRRP | KNKGAG        | AAADGASGGAKP      | KKATFETTKKKE | IGVSDLTLLSKV   |
| F. <i>oxysporum</i>       | MGISRRP | KNKGAG        | AAADGASGGAKP      | KKATFETTKKKE | IGVSDLTLLSKV   |
| F. <i>verticillioides</i> | MGISRRP | KNKGAG        | AAADGASGGAKP      | KKATFETTKKKE | IGVSDLTLLSKV   |
| F. <i>avenaceum</i>       | MGISRRP | KNKGAG        | PAADGANGVAKP      | KKATFETTKKKE | IGVSDLTLLSKV   |
| F. <i>solani</i>          | MGISRRP | KNKDAR        | AGAEAG...AKP      | KKATFETTKKKE | IGVSDLTLLSKV   |
| M. <i>grisea</i>          | MGITRRG | KDKAAAGQ      | AVAGGASGGRRAP     | KKATFETSKKKD | DVGVSDDLTLSSKV |
| B. <i>cinerea</i>         | MGISRRP | KGNNNAS       | AAESAPSGKPNIT     | QKAQFDTTKKKE | VEGVSDLTLLSKV  |
| A. <i>flavus</i>          | MGHSRRP | VGGEEKSRGFGRS | KVADVGDGRQAGKPPQV | KKATFETTKKKE | IGVSDLTLLSKV   |
| S. <i>cerevisiae</i>      | MAILKRG | ARKKVHQP      | AKRSANI           | KKATFDSSKKKE | VEGVSDLTLLSKV  |
| H. <i>sapiens</i>         |         |               |                   |              |                |
| D. <i>discoideum</i>      |         |               |                   |              |                |

|                           | 50             | 60   | 70               | 80        | 90 | 100                   |
|---------------------------|----------------|------|------------------|-----------|----|-----------------------|
| F. <i>graminearum</i>     | SNEAINENLKKRFE | GR   | EIYTYIGHVLVSVNPF | FRDLGIYTD | D  | VLSQSYMGKNRLEMPPHVFA  |
| F. <i>fujikuroi</i>       | SNEAINENLKKRFE | GH   | EIYTYIGHVLVSVNPF | FRDLGIYTD | Q  | VLESYMGKNRLEMPPHVFA   |
| F. <i>oxysporum</i>       | SNEAINENLKKRFE | GH   | EIYTYIGHVLVSVNPF | FRDLGIYTD | Q  | VLESYMGKNRLEMPPHVFA   |
| F. <i>verticillioides</i> | SNEAINENLKKRFE | GR   | EIYTYIGHVLVSVNPF | FRDLGIYTD | Q  | VLESYMGKNRLEMPPHVFA   |
| F. <i>avenaceum</i>       | SNEAINENLKKRFE | GA   | EIYTYIGHVLVSVNPF | FRDLGIYTD | Q  | VLESYMGKNRLEMPPHVFA   |
| F. <i>solani</i>          | SNEAINENLKKRFE | GA   | EIYTYIGHVLVSVNPF | FRDLGIYTD | Q  | VLDTYMGKNRLEMPPHVFA   |
| M. <i>grisea</i>          | SNEAINENLQKRFE | GR   | EIYTYIGHVLVSVNPF | FRDLGIYTD | Q  | VLDSYMGKNRLEMPPHVFA   |
| B. <i>cinerea</i>         | SNEAINENLKKRFD | NR   | EIYTYIGHVLVSVNPF | FRDLGIYTD | A  | VLDSYMGKNRLEMPPHVFA   |
| A. <i>flavus</i>          | SNEAINENLKKRFE | HD   | EIYTYIGHVLVSVNPF | FRDLGIYTD | N  | VLDSYMGKNRLEMPPHVFA   |
| S. <i>cerevisiae</i>      | SDEAINENLKKRFL | LNAT | EIYTYIGHVLVSVNPF | FRDLGIYTD | A  | VMMNRYMGKNRLEMPPHVFA  |
| H. <i>sapiens</i>         |                |      |                  |           |    | KEIEMVYQGAQQYENPPHIYA |
| D. <i>discoideum</i>      |                |      |                  |           |    | DIKAYNGRKYKEMPPHIYA   |

|                           | 110           | 120                   | 130               | 140 | 150            | 160 |
|---------------------------|---------------|-----------------------|-------------------|-----|----------------|-----|
| F. <i>graminearum</i>     | IAEASYYNMKAYS | DNOCVIIISGESGAGKTE    | AAKRIMQYIASVSGGES | SDI | IKQIKDMVLAT    |     |
| F. <i>fujikuroi</i>       | IAEASYYNMKAYS | DNOCVIIISGESGAGKTE    | AAKRIMQYIASVSGGES | SDI | IKQIKDMVLAT    |     |
| F. <i>oxysporum</i>       | IAEASYYNMKAYS | DNOCVIIISGESGAGKTE    | AAKRIMQYIASVSGGES | SDI | IKQIKDMVLAT    |     |
| F. <i>verticillioides</i> | IAEASYYNMKAYS | DNOCVIIISGESGAGKTE    | AAKRIMQYIASVSGGES | SDI | IKQIKDMVLAT    |     |
| F. <i>avenaceum</i>       | IAEASYYNMKAYS | DNOCVIIISGESGAGKTE    | AAKRIMQYIASVSGGES | SDI | IKQIKDMVLAT    |     |
| F. <i>solani</i>          | IAEASYYNMKAYS | DNOCVIIISGESGAGKTE    | AAKRIMQYIASVSGGES | SDI | IKQIKDMVLAT    |     |
| M. <i>grisea</i>          | IAEASYYNMKAYS | DNOCVIIISGESGAGKTE    | AAKRIMQYIASVSGGES | SDI | IQIKDMVLAT     |     |
| B. <i>cinerea</i>         | IAEASYYNMKAYS | DNOCVIIISGESGAGKTE    | AAKRIMQYIANVSGGS  | SDI | IQIKDMVLAT     |     |
| A. <i>flavus</i>          | IAEASYYNMKAYS | DNOCVIIISGESGAGKTE    | AAKRIMQYIASVSGGS  | SDI | IQIKDMVLAT     |     |
| S. <i>cerevisiae</i>      | IAESMYYNMKAYS | DNOCVIIISGESGAGKTE    | AAKRIMQYIAAAS     | TH  | ESIGIKDMVLAT   |     |
| H. <i>sapiens</i>         | LADNMVYRNMI   | IDRENOCVIIISGESGAGKTE | AAKYIMSYISRVSGG   | GT  | KVQHVVDIILQS   |     |
| D. <i>discoideum</i>      | LANDAVYRSMR   | QENOCVIIISGESGAGKTE   | AAKKIMQFLTFVSS    | Q   | SPNGERISKMLLDS |     |

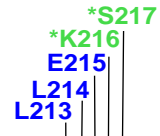

|                           | 170           | 180           | 190    | 200        | 210  | 220                  |
|---------------------------|---------------|---------------|--------|------------|------|----------------------|
| F. <i>graminearum</i>     | NPLLESFGNAKTL | ERNNNSRRGKYL  | QIYFN  | TQGEPEVGA  | ITN  | YLLKSRVVGQITNERNF    |
| F. <i>fujikuroi</i>       | NPLLESFGNAKTL | ERNNNSRRGKYL  | QIYFN  | TAQGEPEVGA | ITN  | YLLKSRVVGQITNERNF    |
| F. <i>oxysporum</i>       | NPLLESFGNAKTL | ERNNNSRRGKYL  | QIYFN  | TAQGEPEVGA | ITN  | YLLKSRVVGQITNERNF    |
| F. <i>verticillioides</i> | NPLLESFGNAKTL | ERNNNSRRGKYL  | QIYFN  | TAQGEPEVGA | ITN  | YLLKSRVVGQITNERNF    |
| F. <i>avenaceum</i>       | NPLLESFGNAKTL | ERNNNSRRGKYL  | QIYFN  | TQGEPEVGA  | ITN  | YLLQSRVVGQITNERNF    |
| F. <i>solani</i>          | NPLLESFGNAKTL | ERNNNSRRGKYL  | QIYFN  | TAQGEPEVGA | ITN  | YLLKTRVVGQITNERNF    |
| M. <i>grisea</i>          | NPLLESFGNAKTL | ERNNNSRRGKYL  | QIHFNS | VGEPEVGA   | ITN  | YLLKSRVVGQITNERNF    |
| B. <i>cinerea</i>         | NPLLESFGNAKTL | ERNNNSRRGKYL  | QLOFN  | TAQGEPEVGA | ITN  | YLLKTRVVTIKDERNF     |
| A. <i>flavus</i>          | NPLLESFGNAKTL | ERNNNSRRGKYLE | LEFN   | ANGEPEVGA  | ITN  | YLLKSRVVGQIANERNF    |
| S. <i>cerevisiae</i>      | NPLLESFGCAKTL | ERNNNSRRGKYLE | IKFN   | QFEPACAGN  | ITN  | YLLKQRVVSQIKNERNF    |
| H. <i>sapiens</i>         | NPLLEAFGNAKTL | VRNNSRRGKYF   | EIQF   | SPGPE      | DGGK | ISNFLLKSRVVMRNP      |
| D. <i>discoideum</i>      | NPLLEAFGNAKTL | VRNNSRRGKYMEM | QFN    | AVGSP      | IGGK | ITNYLLKSRVVGRTQGERSF |

|                           | 230      | 240        | 250     | 260     | 270      | 280                       |
|---------------------------|----------|------------|---------|---------|----------|---------------------------|
| F. <i>graminearum</i>     | HIFYQFAK | GASQQYRETF | FGVQK   | PETYVY  | TSRSKCL  | DVDGIDDLAEFEDTLNAMKVIIGLS |
| F. <i>fujikuroi</i>       | HIFYQFAK | GASQQYRETF | FGVQK   | PETYVY  | TSRSKCL  | DVDGIDDLAEFQDTLNAKVIIGLT  |
| F. <i>oxysporum</i>       | HIFYQFAK | GASQQYRETF | FGVQK   | PETYVY  | TSRSKCL  | DVDGIDDLAEFQDTLNAKVIIGLT  |
| F. <i>verticillioides</i> | HIFYQFAK | GASQQYRETF | FGVQK   | PETYVY  | TSRSKCL  | DVDGIDDLAEFQDTLNAKVIIGLT  |
| F. <i>avenaceum</i>       | HIFYQFAK | GASEQYRQ   | TFGVQK  | PETYVY  | TSRSKCL  | DVDGIDDLAEFQDTLNAKVIIGLS  |
| F. <i>solani</i>          | HIFYQFTK | GASEHYRQ   | TFGIQK  | PETYVY  | TSRSKCF  | DVDGIDDLAEFQDTLNAKVIIGLS  |
| M. <i>grisea</i>          | HIFYQFTK | GASEHYRQ   | TFGIQK  | PETYVY  | TSRSKCL  | DVDGIDDLAEFQDTLNAKVIIGLS  |
| B. <i>cinerea</i>         | HIFYQFTK | GASQAYRE   | NFGIQQ  | PSQYL   | YTSKAGCF | DVDGIDDLAEYQDTLNAKVIIGLS  |
| A. <i>flavus</i>          | HIFYQFTK | KAAPQYRQ   | DMFGVQK | PQSYL   | YTSRSKCF | DVPGVDDNAEFQDTLNAKVIIGMS  |
| S. <i>cerevisiae</i>      | HIFYQFTK | GASDAYRQ   | TFGVQK  | PQSYVY  | TAAGCIS  | SAETIDDLQDYQETLNAKVIIGL   |
| H. <i>sapiens</i>         | HIFYQLIE | GASAEQK    | HSLGIT  | MDYVY   | YLSLSGS  | YKVDDIDDRREFQETLNAKVIIGIF |
| D. <i>discoideum</i>      | HIFYQML  | KGLSQSK    | LNELGLT | PNAPAYE | YLLKSGC  | FVSTIDDSGEFKIIVKAMETLGLK  |

|                           |       |          |           |         |       |        |
|---------------------------|-------|----------|-----------|---------|-------|--------|
|                           | 290   | 300      | 310       | 320     | 330   | 340    |
| <b>F. graminearum</b>     | QPEOD | IFRMLSA  | ILWIGNIQ  | QEDQGG  | ..... | YAEVTD |
| <b>F. fujikuroi</b>       | QAEOD | EIFRMLAA | ILWIGNIQ  | QEDQGG  | ..... | YAEVID |
| <b>F. oxysporum</b>       | QAEOD | EIFRMLAA | ILWIGNIQ  | QEDQGG  | ..... | YAEVID |
| <b>F. verticillioides</b> | QAEOD | EIFRMLAA | ILWVGNIQ  | QEDQGG  | ..... | YAEVID |
| <b>F. avenaceum</b>       | QAEOD | IFRMLSA  | ILWIGNIQ  | QEDQNG  | ..... | YAEVKD |
| <b>F. solani</b>          | QPEOD | EIFRMLAA | ILWIGNIQ  | QEDQGG  | ..... | YAEVID |
| <b>M. grisea</b>          | QEEOD | SVFRILAA | ILWTGNLVE | REDEEG  | ..... | YAAVTD |
| <b>B. cinerea</b>         | QAEOD | EIFRMLAA | ILWTGNIQ  | QREDEEG | ..... | YAAVVD |
| <b>A. flavus</b>          | EAEOD | NVFRMLAA | ILWIGNVQ  | FAEDDSG | ..... | NAALSD |
| <b>S. cerevisiae</b>      | QEEOD | QIFRMLAA | ILWIGNVSE | ENEESG  | ..... | NAQVRD |
| <b>H. sapiens</b>         | AEEOT | LVLQIVAG | ILHLGNISE | KEVGN   | ..... | YAAVES |
| <b>D. discoideum</b>      | ESDON | SIWRILAA | ILHIGNIT  | RAEAEQ  | RTGTT | TVKVS  |

**M375**

|                           |          |          |          |       |          |
|---------------------------|----------|----------|----------|-------|----------|
|                           | 350      | 360      | 370      | 380   | 390      |
| <b>F. graminearum</b>     | ITIRILTP | PRNG...  | EVIESPAN | PAQAQ | ATRDALAM |
| <b>F. fujikuroi</b>       | ITIRILTP | PRNG...  | EVIESPAN | PAQAQ | ATRDALAM |
| <b>F. oxysporum</b>       | ITIRILTP | PRNG...  | EVIESPAN | PAQAQ | ATRDALAM |
| <b>F. verticillioides</b> | ITIRILTP | PRNG...  | EVIESPAN | PAQAQ | ATRDALAM |
| <b>F. avenaceum</b>       | ITIRILTP | PRNG...  | EVIESPAN | PSQAQ | ATRDALAM |
| <b>F. solani</b>          | ITIRILTP | PRNG...  | EVIESPAN | PSQAQ | ATRDALAK |
| <b>M. grisea</b>          | ITIRILTP | PRSG...  | EVIESPAN | VQAQ  | ATRDALAK |
| <b>B. cinerea</b>         | ITIRILTP | PRNG...  | EVIESPAN | VPQAQ | ATRDALAK |
| <b>A. flavus</b>          | LTIRIMET | TARGGRRG | SVYEVPLN | TVQAL | AVRDALSK |
| <b>S. cerevisiae</b>      | LVERIMET | TNHGMKRG | SVYHVPLN | IVQAD | AVRDALAK |
| <b>H. sapiens</b>         | LTSRQMSK | WGW.GKS  | ESIHTV   | TLNVE | QAQCYT   |
| <b>D. discoideum</b>      | LCYRSIST | GVG.KRC  | SVISV    | PMDCN | QAAYS    |

**\*E420**

Y409      F419      \*S418      C423      \*I424

|                           |        |           |           |       |         |      |
|---------------------------|--------|-----------|-----------|-------|---------|------|
|                           | 400    | 410       | 420       | 430   | 440     | 450  |
| <b>F. graminearum</b>     | TNTIG  | LDIYGFEL  | FEKNSFEOL | CINYN | NEKLOQ  | IFIQ |
| <b>F. fujikuroi</b>       | TNTIG  | LDIYGFEL  | FEKNSFEOL | CINYN | NEKLOQ  | IFIQ |
| <b>F. oxysporum</b>       | TNTIG  | LDIYGFEL  | FEKNTFEOL | CINYN | NEKLOQ  | IFIQ |
| <b>F. verticillioides</b> | TNTIG  | LDIYGFEL  | FEKNTFEOL | CINYN | NEKLOQ  | IFIQ |
| <b>F. avenaceum</b>       | TNTIG  | LDIYGFEL  | FEKNSFEOL | CINYN | NEKLOQ  | IFIQ |
| <b>F. solani</b>          | TNTIG  | LDIYGFEL  | FEKNSFEOL | CINYN | NEKLOQ  | IFIQ |
| <b>M. grisea</b>          | SNSVGL | LDIYGFEL  | FEKNSFEOL | CINYN | NEKLOQ  | IFIQ |
| <b>B. cinerea</b>         | SNSVGL | LDIYGFEL  | FEKNSFEOL | CINYN | NEKLOQ  | IFIQ |
| <b>A. flavus</b>          | ANSVGL | LDIYGFEL  | FEKNSFEOL | CINYN | NEKLOQ  | IFIQ |
| <b>S. cerevisiae</b>      | EKSIG  | LDIYGFEL  | FEKNSFEOL | CINYN | NEKLOQ  | IFIQ |
| <b>H. sapiens</b>         | Y.NIG  | VLDIYGFEL | FQKNGFEQ  | CINF  | NEKLOQ  | IFIQ |
| <b>D. discoideum</b>      | GPVIG  | LDIYGFEL  | VQNNSEOL  | LNINF | CNEKLOQ | IFIQ |

|                           |         |         |          |         |            |         |
|---------------------------|---------|---------|----------|---------|------------|---------|
|                           | 460     | 470     | 480      | 490     | 500        | 510     |
| <b>F. graminearum</b>     | FDNKVV  | CDLIEQ  | IRPVG    | GIFSAMK | DATKTAHADP | AACDR   |
| <b>F. fujikuroi</b>       | FDNKVV  | CDLIEQ  | IRPVG    | GIFSAMK | DATKTAHADP | AACDR   |
| <b>F. oxysporum</b>       | FDNKVV  | CDLIEQ  | IRPVG    | GIFSAMK | DATKTAHADP | AACDR   |
| <b>F. verticillioides</b> | FDNKVV  | CDLIEQ  | IRPVG    | GIFSAMK | DATKTAHADP | AACDR   |
| <b>F. avenaceum</b>       | FDNKVV  | CDLIEQ  | VRPVG    | GIFSAMK | DATKTAHADP | AACDR   |
| <b>F. solani</b>          | FDNKVV  | CDLIEQ  | IRPVG    | GIFSAMK | DATKTAHADP | AACDR   |
| <b>M. grisea</b>          | FDNKVV  | CDLIES  | MRPVG    | GIFSAMK | DATKTAHADP | AACDR   |
| <b>B. cinerea</b>         | FDNKVV  | CDLIES  | MRPVG    | GIFSAMK | DATKTAHADP | AACDR   |
| <b>A. flavus</b>          | FDNKVV  | CDLIEA  | KRPVG    | GIFSAMK | DATKTAHADP | AACDR   |
| <b>S. cerevisiae</b>      | FDNKVV  | CDLIEA  | KRPVG    | GIFSAMK | DATKTAHADP | AACDR   |
| <b>H. sapiens</b>         | FNNKVV  | CDLIENK | VNPPG    | GIMSIL  | DDVCA      | TMHAVGE |
| <b>D. discoideum</b>      | FNNKVIC | CELIE   | KKPIGLIS | LLDEACL | IAKST      | ...DQ   |

N538

K537      D536      D540

|                           |        |          |      |         |        |
|---------------------------|--------|----------|------|---------|--------|
|                           | 520    | 530      | 540  | 550     | 560    |
| <b>F. graminearum</b>     | N..... | FIKHYAGD | VYTV | VEGITD  | KNKDQL |
| <b>F. fujikuroi</b>       | N..... | FIKHYAGD | VYTV | VEGITD  | KNKDQL |
| <b>F. oxysporum</b>       | N..... | FIKHYAGD | VYTV | VEGITD  | KNKDQL |
| <b>F. verticillioides</b> | N..... | FIKHYAGD | VYTV | VEGITD  | KNKDQL |
| <b>F. avenaceum</b>       | N..... | FIKHYAGD | VYTV | VEGITD  | KNKDQL |
| <b>F. solani</b>          | N..... | FIKHYAGD | VYTV | VEGITD  | KNKDQL |
| <b>M. grisea</b>          | S..... | FIKHYAGD | VYTV | VEGITD  | KNKDQL |
| <b>B. cinerea</b>         | N..... | FIKHYAGD | VYTV | VEGITD  | KNKDQL |
| <b>A. flavus</b>          | Q..... | FIKHYAGD | VYTV | VEGITD  | KNKDQL |
| <b>S. cerevisiae</b>      | K..... | FIKHYAGD | VYTV | VEGITD  | KNKDQL |
| <b>H. sapiens</b>         | G..... | FIKHYAGD | VYTV | VEGITD  | KNKDQL |
| <b>D. discoideum</b>      | SKDRS  | IGDTC    | FR   | LKHYAGD | VYTV   |

\*A577

|                    |        |           |       |     |        |                         |             |
|--------------------|--------|-----------|-------|-----|--------|-------------------------|-------------|
|                    | 570    | 580       | 590   | 600 | 610    | 620                     |             |
| F. graminearum     | TDNRKQ | PPSAGDRIR | ASANA | LVD | TLMKCO | PSYIRTIKPNENKSPTEYNGP   | NVLEHQIKYLG |
| F. fujikuroi       | QDNRKQ | PPSAGDRIR | ASANA | LVE | TLMKCO | PSYIRTIKPNENKSPTEYNSP   | NVLEHQIKYLG |
| F. oxysporum       | QDNRKQ | PPSAGDRIR | ASANA | LVD | TLMKCO | PSYIRTIKPNENKSPTEYNSP   | NVLEHQIKYLG |
| F. verticillioides | QDNRKQ | PPSAGDRIR | ASANA | LVD | TLMKCO | PSYIRTIKPNENKSPTEYNSP   | NVLEHQIKYLG |
| F. avenaceum       | TDNRKQ | PPSAGDRIR | ASANA | LVD | TLMKCO | PSYIRTIKPNENKSPTEYNGP   | NVLEHQIKYLG |
| F. solani          | QDNRKQ | PPSAGDRIR | TSANA | LVD | TLMKCO | PSYIRTIKPNENKSPTEYNGP   | NVLEHQIKYLG |
| M. grisea          | QDNRKQ | PPSAGDRIR | TSANA | LVE | TLMKCO | PSYIRTIKPNENKSPTEYNSP   | NVLEHQIKYLG |
| B. cinerea         | QDNRKQ | PPSAGDKIK | SAND  | LVA | TLMKA  | TPSYIRTIKPNENKSPTEYNEKN | NVLEHQVKYLG |
| A. flavus          | QDDKRR | PPSAGDKIK | SAND  | LVA | TLMKA  | TPSYIRTIKPNENKSPTEYNSP  | NVLEHQIKYLG |
| S. cerevisiae      | RESKRR | PPSAGDKIK | SAND  | LVE | TLSKA  | TPSYIRTIKPNENKSPTEYNSP  | NVLEHQIKYLG |
| H. sapiens         | ADKKGR | PPSAGDKIK | SAND  | LVE | TLSKA  | TPSYIRTIKPNENKSPTEYNSP  | NVLEHQIKYLG |
| D. discoideum      | EDSKKR | PPSAGDKIK | SAND  | LVE | TLSKA  | TPSYIRTIKPNENKSPTEYNSP  | NVLEHQIKYLG |

|                    |         |           |              |      |            |            |            |
|--------------------|---------|-----------|--------------|------|------------|------------|------------|
|                    | 630     | 640       | 650          | 660  | 670        | 680        |            |
| F. graminearum     | LQENVRI | RRAGFAVRQ | DFDKFVDRFFLL | LSPA | TSYAGEFTWE | GTTEAAVKQI | LKDTSSIPKE |
| F. fujikuroi       | LQENVRI | RRAGFAVRQ | DFDKFVDRFFLL | LSPA | TSYAGEFTWE | GTTEAAVKQI | LKDTSSIPKE |
| F. oxysporum       | LQENVRI | RRAGFAVRQ | DFDKFVDRFFLL | LSPA | TSYAGEFTWE | GTTEAAVKQI | LKDTSSIPKE |
| F. verticillioides | LQENVRI | RRAGFAVRQ | DFDKFVDRFFLL | LSPA | TSYAGEFTWE | GTTEAAVKQI | LKDTSSIPKE |
| F. avenaceum       | LQENVRI | RRAGFAVRQ | DFDKFVDRFFLL | LSPA | TSYAGEFTWE | GTTEAAVKQI | LKDTSSIPKE |
| F. solani          | LQENVRI | RRAGFAVRQ | DFDKFVDRFFLL | LSPA | TSYAGEFTWE | GTTEAAVKQI | LKDTSSIPKE |
| M. grisea          | LQENVRI | RRAGFAVRQ | DFDKFVDRFFLL | LSPA | TSYAGEFTWE | GTTEAAVKQI | LKDTSSIPKE |
| B. cinerea         | LQENVRI | RRAGFAVRQ | DFDKFVDRFFLL | LSPA | TSYAGEFTWE | GTTEAAVKQI | LKDTSSIPKE |
| A. flavus          | LQENVRI | RRAGFAVRQ | DFDKFVDRFFLL | LSPA | TSYAGEFTWE | GTTEAAVKQI | LKDTSSIPKE |
| S. cerevisiae      | LQENVRI | RRAGFAVRQ | DFDKFVDRFFLL | LSPA | TSYAGEFTWE | GTTEAAVKQI | LKDTSSIPKE |
| H. sapiens         | LQENVRI | RRAGFAVRQ | DFDKFVDRFFLL | LSPA | TSYAGEFTWE | GTTEAAVKQI | LKDTSSIPKE |
| D. discoideum      | LQENVRI | RRAGFAVRQ | DFDKFVDRFFLL | LSPA | TSYAGEFTWE | GTTEAAVKQI | LKDTSSIPKE |

|                    |         |           |      |              |         |           |              |
|--------------------|---------|-----------|------|--------------|---------|-----------|--------------|
|                    | 690     | 700       | 710  | 720          | 730     | 740       |              |
| F. graminearum     | EWQMGVT | KAFIKAPET | LFAL | EHRDRYWHNMAT | RIORMWR | AYLAYRAES | ATRIQRFLWRKK |
| F. fujikuroi       | EWQMGVT | KAFIKAPET | LFAL | EHRDRYWHNMAT | RIORMWR | AYLAYRAES | ATRIQRFLWRKK |
| F. oxysporum       | EWQMGVT | KAFIKAPET | LFAL | EHRDRYWHNMAT | RIORMWR | AYLAYRAES | ATRIQRFLWRKK |
| F. verticillioides | EWQMGVT | KAFIKAPET | LFAL | EHRDRYWHNMAT | RIORMWR | AYLAYRAES | ATRIQRFLWRKK |
| F. avenaceum       | EWQMGVT | KAFIKAPET | LFAL | EHRDRYWHNMAT | RIORMWR | AYLAYRAES | ATRIQRFLWRKK |
| F. solani          | EWQMGVT | KAFIKAPET | LFAL | EHRDRYWHNMAT | RIORMWR | AYLAYRAES | ATRIQRFLWRKK |
| M. grisea          | EWQMGVT | KAFIKAPET | LFAL | EHRDRYWHNMAT | RIORMWR | AYLAYRAES | ATRIQRFLWRKK |
| B. cinerea         | EWQMGVT | KAFIKAPET | LFAL | EHRDRYWHNMAT | RIORMWR | AYLAYRAES | ATRIQRFLWRKK |
| A. flavus          | EWQMGVT | KAFIKAPET | LFAL | EHRDRYWHNMAT | RIORMWR | AYLAYRAES | ATRIQRFLWRKK |
| S. cerevisiae      | EWQMGVT | KAFIKAPET | LFAL | EHRDRYWHNMAT | RIORMWR | AYLAYRAES | ATRIQRFLWRKK |
| H. sapiens         | EWQMGVT | KAFIKAPET | LFAL | EHRDRYWHNMAT | RIORMWR | AYLAYRAES | ATRIQRFLWRKK |
| D. discoideum      | EWQMGVT | KAFIKAPET | LFAL | EHRDRYWHNMAT | RIORMWR | AYLAYRAES | ATRIQRFLWRKK |

|                    |         |          |            |          |            |            |               |               |               |
|--------------------|---------|----------|------------|----------|------------|------------|---------------|---------------|---------------|
|                    | 750     | 760      | 770        | 780      | 790        | 800        |               |               |               |
| F. graminearum     | RTGAEYL | QLRDGHQ  | VLGGRKERRR | MSLLG    | RRFLGDYMGV | NASTGPG    | GAQIRNAAGIGSN |               |               |
| F. fujikuroi       | RTGAEYL | QLRDGHQ  | VLGGRKERRR | MSLLG    | RRFLGDYMGV | NASTGPG    | GAQIRNAAGIGSN |               |               |
| F. oxysporum       | RTGAEYL | QLRDGHQ  | VLGGRKERRR | MSLLG    | RRFLGDYMGV | NASTGPG    | GAQIRNAAGIGSN |               |               |
| F. verticillioides | RTGAEYL | QLRDGHQ  | VLGGRKERRR | MSLLG    | RRFLGDYMGV | NASTGPG    | GAQIRNAAGIGSN |               |               |
| F. avenaceum       | RTGAEYL | QLRDGHQ  | VLGGRKERRR | MSLLG    | RRFLGDYMGV | NASTGPG    | GAQIRNAAGIGSN |               |               |
| F. solani          | RTGAEYL | QLRDGHQ  | VLGGRKERRR | MSLLG    | RRFLGDYMGV | NASTGPG    | GAQIRNAAGIGSN |               |               |
| M. grisea          | RTGAEYL | QLRDGHQ  | VLGGRKERRR | MSLLG    | RRFLGDYMGV | NASTGPG    | GAQIRNAAGIGSN |               |               |
| B. cinerea         | REGKEFL | ELREKGHQ | VLGGRKERRR | MSLLG    | RRFLGDYMGV | NASTGPG    | GAQIRNAAGIGSN |               |               |
| A. flavus          | TGGLLEL | LKVRDGHQ | VLGGRKERRR | MSLLG    | RRFLGDYMGV | NASTGPG    | GAQIRNAAGIGSN |               |               |
| S. cerevisiae      | KEGNRYE | KLRDYGT  | VLGGRKERRR | MSLLG    | RRFLGDYMGV | NASTGPG    | GAQIRNAAGIGSN |               |               |
| H. sapiens         | ..KRYV  | QMR      | ELASDLLLN  | KKERRR   | MSLLG      | RRFLGDYMGV | NASTGPG       | GAQIRNAAGIGSN |               |
| D. discoideum      | ..SKWN  | OR       | KAATIK     | IQLFYRSY | RYKWF      | ..RE       | LHRAF         | KDVARDPQW     | GKQVFWPKHPSIL |

|                    |        |                |       |       |      |              |                             |
|--------------------|--------|----------------|-------|-------|------|--------------|-----------------------------|
|                    | 810    | 820            | 830   | 840   | 850  | 860          |                             |
| F. graminearum     | EKAVFS | CRGEILEAKFGRSS | KASPR | IIVV  | NSKF | YIIAQMLVNGQF | QITVEKSVPLG..A              |
| F. fujikuroi       | EKAVFS | CRGEILEAKFGRSS | KASPR | IIVV  | NSKF | YIIAQMLVNGQF | QITVEKSVPLG..A              |
| F. oxysporum       | EKAVFS | CRGEILEAKFGRSS | KASPR | IIVV  | NSKF | YIIAQMLVNGQF | QITVEKSVPLG..A              |
| F. verticillioides | EKAVFS | CRGEILEAKFGRSS | KASPR | IIVV  | NSKF | YIIAQMLVNGQF | QITVEKSVPLG..A              |
| F. avenaceum       | EKAVFS | CRGEILEAKFGRSS | KASPR | IIVV  | NSKF | YIIAQMLVNGQF | QITVEKSVPLG..A              |
| F. solani          | EKAVFS | CRGEILEAKFGRSS | KASPR | IIVV  | NSKF | YIIAQMLVNGQF | QITVEKSVPLG..A              |
| M. grisea          | EKAVFS | CRGEILEAKFGRSS | KASPR | IIVV  | NSKF | YIIAQMLVNGQF | QITVEKSVPLG..A              |
| B. cinerea         | EATIFS | CRGEILEAKFGRSS | KASPR | IIVV  | NSKF | YIIAQMLVNGQF | QITVEKSVPLG..A              |
| A. flavus          | DDILFS | CRGEILEAKFGRSS | KASPR | IIVV  | NSKF | YIIAQMLVNGQF | QITVEKSVPLG..A              |
| S. cerevisiae      | EKAVFS | CRGEILEAKFGRSS | KASPR | IIVV  | NSKF | YIIAQMLVNGQF | QITVEKSVPLG..A              |
| H. sapiens         | DTVTK  | ..             | YDRRF | KGVK  | RD   | LLTPKCL      | YLIGREKVKQGPDKGLVKEVLRKRRIE |
| D. discoideum      | DRAVQ  | ..             | LTHKI | HNCWR | ..   | ..           | ..                          |

870 880 890 900 910 920  
F. graminearum IKF IGVSSARDDWFSLGI GSPQEADPLMNC F KTE MFT QMQRVMPGG. F NLKI AET IEYA  
F. fujikuroi IKF IGVSSARDDWFSLGI GSPQEADPLMNC M LKTE MFT QMQRVMPGG. F NLKI AET IEYA  
F. oxysporum IKF IGVSSARDDWFSLGI GSPQEADPLMNC M LKTE MFT QMQRVMPGG. F NLKI AET IEYA  
F. verticillioides IKF IGVSSARDDWFSLGI GSPQEADPLMNC M F KTE MFT QMQRVMPGG. F NLKI AET IEYA  
F. avenaceum IKF IGVSSARDDWFSLGI GSPQEADPLMNC M F KTE MFT QMQRVMPGG. F NLKI AET IEYA  
F. solani . . . . .  
M. grisea IKF IGVSSARDDWFSLGI GSPQEADPLMNC V LKTE MFT QMERVMPGG. F NLKI GDS IEYA  
B. cinerea IKF VSI STCRDDWFSLGI GSPQEADPLMNC V F KTE LFT HMQGAMPGGGF NLKI GDS IEYA  
A. flavus IKA VST SNLKD WFS LII GGG. QEP DPLIN CV F KTE F FT HLQTALRGQ. L NLKV SEN IEYN  
S. cerevisiae IQAVSL TNLQDDWVAIKL ASSGQPP DPLIN TY F KTE LIT H LK. . RLNDKI QIKI GSA IEYQ  
H. sapiens IER ILSVSLSTMDD I F I LHE QEY D S L L E S V F KTE F L S L LAKRYE EKT QKQL LKFSNTL  
D. discoideum EKM ILSL GAG QNH MRQ KVMAY D I F H G K K K W D F R R H F D A D Y L E K P S N P N Q Q K Y V L A M Q N L F

930 940 950 960 970 980  
F. graminearum KKP GK I Q Q V L K D . . S Q V P A D Y Y K S G A V H C Q P G E P P S S V S R P T P K G K P V P P R P I T R G K L  
F. fujikuroi KKP G K M Q Q V K V L K D . . S Q L P V D Y Y K S G A V H T Q P G E P P S S I S R P T P K G K P V P P R P I T R G K L  
F. oxysporum KKP G K M Q Q V K V L K D . . S Q L P V D Y Y K S G A V H T Q P G E P P S S V S R P T P K G K P V P P R P I T R G K L  
F. verticillioides KKP G K M Q Q V K V L K D . . S Q L P V D Y Y K S G A V H T Q P G E P P S S I S R P T P K G K P V P P R P I T R G K L  
F. avenaceum KKP N K M Q Q V K V M K D . . S Q L P V D Y Y K S G A V H T Q P G E P P S S G S K P T P K G K P V P P R P I T R G K L  
F. solani . . . . .  
M. grisea KKP G K M Q V V K V L K D . . S P N P V D F Y K S G A V H T Q Q G E P P S S V S R P T P K G K P V P P R P I T R G K L  
B. cinerea KKP N K M Q L I K V V K D . . S Q A Q D H Y K S A T I H T Q A G E P P T S R S K P L P K G K P V A P K P F T S G R L  
A. flavus KKP G K L A T V K A I K D P A A S P N V D T Y K S H T I H T S P G E P P S S V S K P T P K A K Q V A A R P V T K G K H  
S. cerevisiae KKP G K L H S V K C Q I N E S A P K Y G D I Y K S S T I S V R R G N P P N S Q V H K K P R K K S . . . . . I S S G Y H  
H. sapiens E L K L K K E N W G P W S A G G S R Q V Q F H Q G F G D L A V L K P S N K V L Q V S I G P G . . . . . L  
D. discoideum S T Y G . . . . . D T E V L F A D Y V I K . . . . .

990 1000 1010 1020 1030  
F. graminearum IKP G G P N G R P S R I Q G N R A A K P R P G G G A R A V P Q P P V A V S A A A S I P A A V P . . . . .  
F. fujikuroi IKP G G P N G R P S R I Q G N R T A K P R P G . A G R A V P Q P P A A V S N I A A V P A A A A Q S T P R I A P R P G A  
F. oxysporum IKP G G P N G R P S R I Q G N R T A K P R P G . A G R A V P Q P P A A V S N I A A V P A A A T Q S T P R I A P R P G A  
F. verticillioides IKP G G P N G R P S R I Q G N R T A K P R P G . A G R A V P Q P P A A V S N I A A V P A A A T Q S T P R I A P R P G A  
F. avenaceum I R P G G P N G R P S R I Q A T . . . K P R P G A G T R A V P Q P P A A L A A A S I P A A A T Q A T P R I A P R P V A  
F. solani . . . . .  
M. grisea I R P G G P N G R P A R G I T N R T P Q P R P G G A S A S A V A S R P V P Q A Q P . . . . .  
B. cinerea I K P G G P G G R P S K L T N G N R P T P K P V P S P A A A R P V P T P A A A A M P I P A P I P A A N . . . . .  
A. flavus L R P G G P G G G P S K L A S R P A S R P T P K P Q P L P Q S Q P A T A Q P I P A P Q P A A V P . . . . .  
S. cerevisiae A S S S Q A T R R P V S I A A A Q H V P T A P A S R H S K K P A P P P P G M Q N K A A T R R S V P N P A S T L T A S K S  
H. sapiens P K N S R P T R R N T T O N T G Y S S G T A N A N Y P V R A A P P P P G . . . . .  
D. discoideum N P K G V P Q R R G I V V T G T N I Y K H D E K N Y K V K K W G T P L V . . . . .

1040 1050 1060 1070 1080  
F. graminearum . . . A P A A A T H N A L P S H A K A A S A A G R A P P P P P P P A A P A R P P S P P R V M A K V L Y D F A G Q R E N E  
F. fujikuroi N A A T I P A A H N A L P S H T R N A S G A G R A P P P P P P . A V A A R P P S P P K V M A K V L Y D F A G Q R E N E  
F. oxysporum N A A A P I P A A H N A L P S H T R N A S G A G R A P P P P P P . P V A A R P P S P P K V M A K V L Y D F A G Q R E N E  
F. verticillioides N A A A P V P A A H N A L P S H T R N A S G A G R A P P P P P P P P A A A R P P S P P K V M A K V L Y D F A G Q R E N E  
F. avenaceum A S A A P T P A A H N P L P S H T R N A S G A G R A P P P P P P P P A A P A R P P S P P K V L A K V L Y D F A G Q R E N E  
F. solani . . . . .  
M. grisea . . . Q A Q A Q V A A S I P V R T Q Q S Q T S S A S V R A P P P P P A A P P A K A K I M A K V L Y D F A G Q K E N E  
B. cinerea . P I A A S I P V H T R N P S L Q S A Q S T R A V P P P P P P P A P P A P P A P A S K E P Q Y R V L Y E F A G Q S A N E  
A. flavus . . . . . R P V P Q P V A A A A S H T R N A S S G S V R A P P P P P A S P P A P K K A T A K A L Y D F T S A Q S N E  
S. cerevisiae N A R P S P P T A A T R A T P A A A A M G S D R Q A N I P P P P P P P S S K P K E P M F E A A Y D F S G S G S P S E  
H. sapiens . . . . . Y H O N G V I R N Q Y V P Y P H A P G S Q R S N Q K S L Y T S M A R P P L P R Q O S T S D R V S  
D. discoideum . . . . . D V T S I S I S . . . . . P M A D T F L V L H C K A P Q R D F V L D L G C N G Y E A V

1090 1100 1110 1120 1130 1140  
F. graminearum L S I T A A G E I V E I V Q K E S N G W W L A K N P Q T A Q Q A W V P A A Y V E E Q A P P A P . . . . . R A P P A P P  
F. fujikuroi L T I T A N E I V E I V Q K E S N G W W L A K N P Q T A Q Q A W V P A A Y V E E Q A P P A P . . . . . R A P P A P P  
F. oxysporum L T I T A N E I V E I V Q K E S N G W W L A K N P Q T A Q Q A W V P A A Y V E E Q A P P A P . . . . . R A P P A P P  
F. verticillioides L T I T A N E I V E I V Q K E S N G W W L A K N P Q T A Q Q A W V P A A Y V E E Q A P P A P . . . . . R A P P A P P  
F. avenaceum L T I T A G Q L V E I V Q K E T N G W W L A K N P N T E Q A W V P A A Y V E E Q A P P A P . . . . . R A P P A P P  
F. solani . . . . .  
M. grisea M S I K E G D L I E I V Q K E N N G W W L A K S . . G N Q Q A W V P A A Y V E E Q K Q A P P P V A A S R P P P P P A P P A  
B. cinerea F S L K Q G E I V T V L Q K E T N G W W L T K N . . V R G Q G W A P T A Y L E E V A P P P P P I A S R P T P P P P P G  
A. flavus L D I R A G D V V Q I V S K E N G W W L C M N M A T S V Q G W T P Q A Y L E E Q V A P T P K A P P P P P P A A P R A  
S. cerevisiae L P L K K G D V I Y I T R E E P S G W S L G K L L D G S K E G W V P T A Y M K P H S G N N . . . . .  
H. sapiens Q T P E S L D F L K V P D Q G A A G V R R Q T T S R P P P A G G R P K P Q P K P K P Q V P Q . . . . .  
D. discoideum S E I T T V I V Q V K L T G V K L S V Q F T S S I T Y N A R P K G S . . . . .

|                           | 1150                                      | 1160  | 1170      |                 |
|---------------------------|-------------------------------------------|-------|-----------|-----------------|
| <b>F. graminearum</b>     | .....RSKPTPPAPPAPKRPAAAG...RKP            | AELQQ | RDSGMSLNT | .PNGSD          |
| <b>F. fujikuroi</b>       | .....RSKPTPPAPPAPKRPAAAN...RKP            | AELQQ | RDSGMSLNT | .PNGGD          |
| <b>F. oxysporum</b>       | .....RSKPTPPAPPAPKRPAAAN...RKP            | AELQQ | RDSGMSLNT | .PNGGD          |
| <b>F. verticillioides</b> | .....RSKPTPPAPPAPKRPAAAN...RKP            | AELQQ | RDSGMSLNT | .PNGGD          |
| <b>F. avenaceum</b>       | .....RSKPMPPAPPAPKRPAAAG...RKP            | AELQQ | RDSGMSLNT | .PNGGS          |
| <b>F. solani</b>          | .....                                     |       |           |                 |
| <b>M. grisea</b>          | .....ANGKNKPLPPAKRPAAAG...KKP             | ASLQP | RDSGMSLNG | .SDG..          |
| <b>B. cinerea</b>         | PPKMNGA...NGAAVRSKPTPPAPPAPKRPVAG...RKP   | APPAP | RDSGMSIS  | SNNGSGNN        |
| <b>A. flavus</b>          | SPVPSANGAAAATAAAAKAKPAPPAPPAPKRPNMAGRKAVP | APPAP | RDSAVSMNS | HDSSGG          |
| <b>S. cerevisiae</b>      | .....                                     | IP    | TPPNR     | NDVPKPVLNSVQHDN |
| <b>H. sapiens</b>         | .....                                     | CKA   | LYAYDAQDT | DELSFNANDIID    |
| <b>D. discoideum</b>      | .....                                     | L     | .....     | DTILTFA         |

|                           | 1180    | 1190    | 1200         | 1210     |              |          |
|---------------------------|---------|---------|--------------|----------|--------------|----------|
| <b>F. graminearum</b>     | SRSSTP  | TPSLGGS | LADALLARK    | NAMQ     | .....KEKEDDD | DW       |
| <b>F. fujikuroi</b>       | SRSSTP  | TPSLGGS | LADALLARK    | NAMQ     | .....KEKEDDD | DW       |
| <b>F. oxysporum</b>       | SRSSTP  | TPSLGGS | LADALLARK    | NAMQ     | .....KEKEDDD | DW       |
| <b>F. verticillioides</b> | SRSSTP  | TPSLGGS | LADALLARK    | NAMQ     | .....KEKEDDD | DW       |
| <b>F. avenaceum</b>       | SRSSTP  | TPSLGGS | LADALLARK    | NAMQ     | .....KEKEDDD | DW       |
| <b>F. solani</b>          | .....   |         |              |          |              |          |
| <b>M. grisea</b>          | SRSNSTP | TPSLGNS | LADALLARK    | QAMA     | .....KKD     | DDDDW.   |
| <b>B. cinerea</b>         | SGRSTP  | TPSLAG  | GLAEALRAR    | QAMQGN   | .....AKK     | EDEDDW   |
| <b>A. flavus</b>          | SGRGTP  | NSTSNAS | LAGGLAEALRAR | QHMQG    | .....KH      | DDDDW    |
| <b>S. cerevisiae</b>      | TSANVIP | AAAQAS  | LDGLANALAR   | ANKMR    | LES          | DDEEANED |
| <b>H. sapiens</b>         | IIKEDP  | SGWWT   | GRLRG        | KQGLFP   | NNYVTKI      | .....    |
| <b>D. discoideum</b>      | PIINDE  | KLIGS   | QFKK         | GKGNQATI | QFKD         | .....    |
